# Supplementary material for: pMD-Membrane: A Method for Ligand Binding Site Identification in Membrane-Bound Proteins
Source: PubMed Central journal article supplement (PMC4623977; doi:10.1371/journal.pcbi.1004469), 2015-10-27
Supplement: pcbi.1004469.s002.pdf [file pcbi.1004469.s002.pdf]

## Supplementary Information

### pMD-membrane: A method for ligand binding site identification in membrane-bound proteins

Priyanka Prakash, Abdallah Sayyed-Ahmad and Alemayehu A. Gorfe\*

University of Texas Health Science Center at Houston, Department of Integrative Biology and Pharmacology, 6431 Fannin St., Houston, Texas 77030

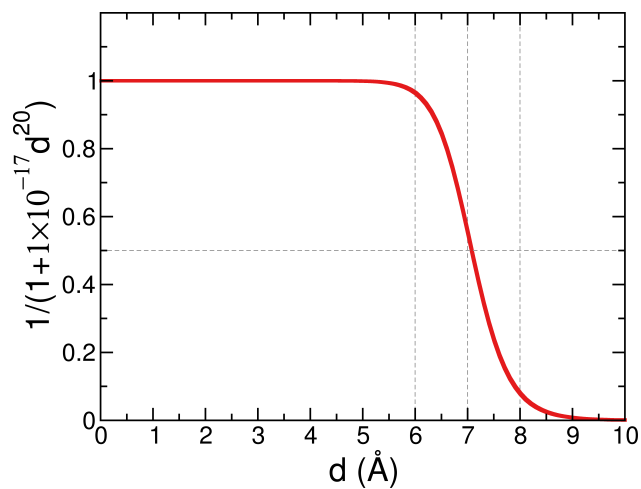

**Figure S2:** Switching function between 6 Å and 8 Å used for the probe occupancy calculation based on equation 1 in the main text.
