# Supplementary material for: pMD-Membrane: A Method for Ligand Binding Site Identification in Membrane-Bound Proteins
Source: PubMed Central journal article supplement (PMC4623977; doi:10.1371/journal.pcbi.1004469), 2015-10-27
Supplement: pcbi.1004469.s003.pdf [file pcbi.1004469.s003.pdf]

## **Supplementary Information**

### **pMD-membrane: A method for ligand binding site identification in membrane-bound proteins**

**Priyanka Prakash, Abdallah Sayyed-Ahmad and Alemayehu A. Gorfe\***

University of Texas Health Science Center at Houston, Department of Integrative Biology and  
Pharmacology, 6431 Fannin St., Houston, Texas 77030

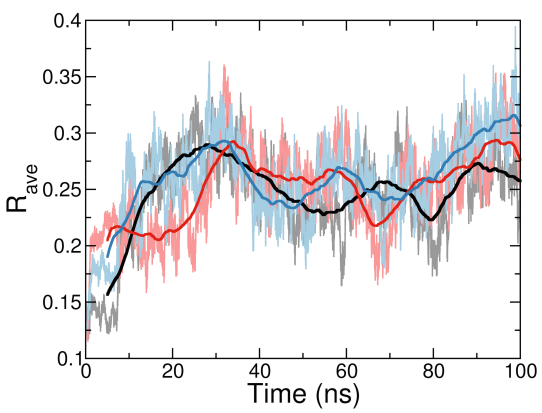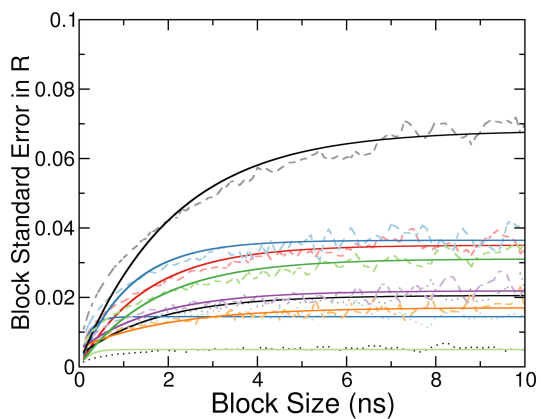

**Figure S3:** Convergence and sampling error. (Left) Time evolution of average probe occupancies calculated using equation 5 for simulations G12D mode 2 (black), G12D mode 1 (red) and G13D (blue). Bold lines indicate 5 ns-running average. (Right) Examples of the dependence of block standard errors (BSE) in  $R_i$  on block size. Shown here are just a few example curves for selected atoms illustrating atoms (see Methods in the main text for details).
